# Supplementary material
Source: PubMed Central journal article supplement (PMC4578724)
Supplement: NIHMS562134-supplement-01.pdf [file NIHMS562134-supplement-01.pdf]

# Supplementary Material for Viral Kinetics of Primary Dengue Virus Infection in Non-Human Primates: A Systematic Review and Individual Pooled Analysis

Benjamin M. Althouse, Anna P. Durbin, Kathryn A. Hanley, Scott B. Halstead, Scott C. Weaver, Derek A. T. Cummings

## Dengue Virus Genotypes Represented

Figure S1 reports the genotypes represented in the identified studies. Genotype names are as reported as in the study.

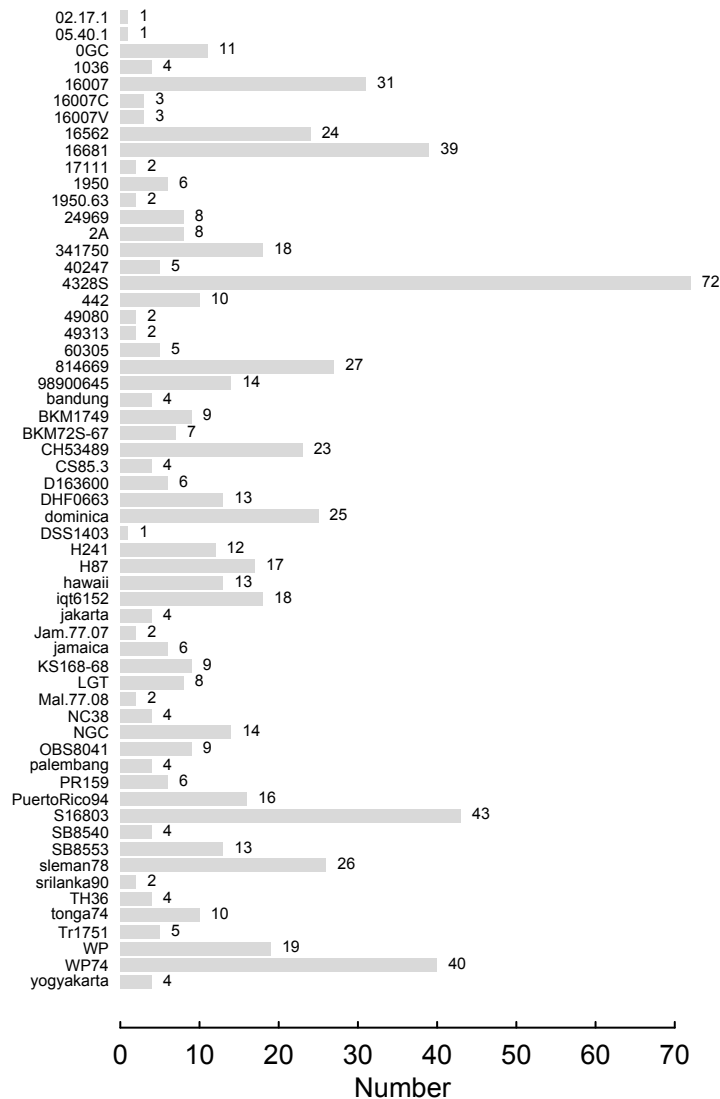

Figure S1: Histogram of DENV Genotypes Used in Studies

## Linear Regression Models

Tables S1 and S2 show univariate and multivariate linear regression results associating time to- and duration of viremia with serotype, species, assay, and inoculating dose. Ignoring the heterogeneity between studies results in many covariates being significantly associated with DENV viral kinetics.

| Covariate                                            | Univariate | 95% CI         | p       | Multivariate | 95% CI         | p       |
|------------------------------------------------------|------------|----------------|---------|--------------|----------------|---------|
| DENV-4                                               | ref.       |                |         | ref.         |                |         |
| DENV-1                                               | 0.25       | (-0.08, 0.59)  | 0.139   | 0.46         | (0.14, 0.77)   | 0.005   |
| DENV-2                                               | -0.28      | (-0.59, 0.03)  | 0.078   | -0.24        | (-0.54, 0.05)  | 0.101   |
| DENV-3                                               | -0.28      | (-0.65, 0.09)  | 0.140   | 0.28         | (-0.06, 0.62)  | 0.111   |
| rhesus macaque ( <i>Macaca mulatta</i> )             | ref.       |                |         |              |                |         |
| chimpanzee ( <i>Pan troglodytes</i> )                | -0.05      | (-0.71, 0.61)  | 0.878   | -0.58        | (-1.20, 0.05)  | 0.070   |
| common marmoset ( <i>Callithrix jacchus</i> )        | -1.36      | (-2.05, -0.67) | < 0.001 | -0.83        | (-1.59, -0.08) | 0.031   |
| cynomolgus macaques ( <i>Macaca fascicularis</i> )   | 0.34       | (-0.37, 1.04)  | 0.353   | 0.39         | (-0.30, 1.07)  | 0.266   |
| green monkey ( <i>Chlorocebus aethiops sabaeus</i> ) | -0.43      | (-1.05, 0.20)  | 0.179   | -0.61        | (-1.35, 0.13)  | 0.109   |
| owl monkeys ( <i>Aotus nancymae</i> )                | -0.30      | (-0.78, 0.18)  | 0.216   | 0.28         | (-0.24, 0.79)  | 0.291   |
| patas ( <i>Erythrocebus patas</i> )                  | 4.16       | (2.41, 5.91)   | < 0.001 | 3.85         | (2.21, 5.48)   | < 0.001 |
| pig-tailed macaques ( <i>Macaca nemestrina</i> )     | -1.14      | (-1.71, -0.57) | < 0.001 | -0.85        | (-1.55, -0.14) | 0.018   |
| spider monkey ( <i>Ateles geoffroyi</i> )            | -1.51      | (-2.02, -0.99) | < 0.001 | -2.50        | (-3.99, -1.01) | 0.001   |
| squirrel monkey ( <i>Saimiri sciureus</i> )          | -0.31      | (-1.67, 1.05)  | 0.659   | -1.24        | (-2.52, 0.04)  | 0.058   |
| white handed gibbon ( <i>Hylobates lar</i> )         | 0.40       | (-0.14, 0.95)  | 0.148   | -0.51        | (-1.10, 0.09)  | 0.096   |
| plaque count                                         | ref.       |                |         |              |                |         |
| ELISA                                                | -0.85      | (-1.84, 0.15)  | 0.097   | 0.13         | (-1.03, 1.30)  | 0.821   |
| FFA                                                  | 0.04       | (-0.82, 0.91)  | 0.921   | 0.23         | (-0.60, 1.06)  | 0.589   |
| IFA                                                  | -1.23      | (-1.50, -0.97) | < 0.001 | -1.48        | (-1.77, -1.18) | < 0.001 |
| RTPCR                                                | -1.05      | (-1.38, -0.72) | < 0.001 | -0.67        | (-1.09, -0.25) | 0.002   |
| suckling mice                                        | -1.76      | (-2.25, -1.27) | < 0.001 | 0.31         | (-1.11, 1.73)  | 0.673   |
| log <sub>10</sub> dose                               | -0.22      | (-0.34, -0.11) | < 0.001 | -0.15        | (-0.29, -0.02) | 0.022   |

Table S1: **Linear Associations with the Time to Viremia** Table reports the results of the univariate and multivariate linear regression calculating associations between serotype, species, viremia assay used, and log<sub>10</sub> inoculating dose and time to viremia. Estimates are differences in days of viremia for each covariate from rhesus monkeys infected with DENV-2 assayed using plaque count.

| Covariate                                            | Univariate | 95% CI         | p       | Multivariate | 95% CI         | p       |
|------------------------------------------------------|------------|----------------|---------|--------------|----------------|---------|
| DENV-4                                               | ref.       |                |         | ref.         |                |         |
| DENV-1                                               | 0.87       | (0.40, 1.34)   | < 0.001 | 0.80         | (0.35, 1.25)   | 0.001   |
| DENV-2                                               | 1.30       | (0.86, 1.73)   | < 0.001 | 1.48         | (1.07, 1.90)   | < 0.001 |
| DENV-3                                               | 0.02       | (-0.49, 0.54)  | 0.928   | -0.26        | (-0.75, 0.23)  | 0.297   |
| rhesus macaque ( <i>Macaca mulatta</i> )             | ref.       |                |         |              |                |         |
| chimpanzee ( <i>Pan troglodytes</i> )                | 0.03       | (-0.95, 1.02)  | 0.949   | 0.83         | (-0.06, 1.73)  | 0.067   |
| common marmoset ( <i>Callithrix jacchus</i> )        | 0.13       | (-0.90, 1.16)  | 0.802   | -2.39        | (-3.47, -1.31) | < 0.001 |
| cynomolgus macaques ( <i>Macaca fascicularis</i> )   | 0.24       | (-0.81, 1.30)  | 0.653   | -0.22        | (-1.20, 0.75)  | 0.656   |
| green monkey ( <i>Chlorocebus aethiops sabaeus</i> ) | -1.61      | (-2.53, -0.68) | 0.001   | -1.91        | (-2.97, -0.85) | < 0.001 |
| owl monkeys ( <i>Aotus nancymaeae</i> )              | -0.35      | (-1.07, 0.36)  | 0.330   | -1.35        | (-2.08, -0.62) | < 0.001 |
| patas ( <i>Erythrocebus patas</i> )                  | -2.97      | (-5.58, -0.35) | 0.026   | -2.56        | (-4.89, -0.24) | 0.031   |
| pig-tailed macaques ( <i>Macaca nemestrina</i> )     | -0.03      | (-0.88, 0.82)  | 0.937   | -1.15        | (-2.15, -0.15) | 0.025   |
| spider monkey ( <i>Ateles geoffroyi</i> )            | -0.83      | (-1.60, -0.06) | 0.035   | 0.64         | (-1.49, 2.76)  | 0.557   |
| squirrel monkey ( <i>Saimiri sciureus</i> )          | -1.57      | (-3.60, 0.46)  | 0.130   | -1.02        | (-2.84, 0.81)  | 0.276   |
| white handed gibbon ( <i>Hylobates lar</i> )         | 0.27       | (-0.54, 1.09)  | 0.508   | 0.46         | (-0.39, 1.30)  | 0.290   |
| plaque count                                         | ref.       |                |         |              |                |         |
| ELISA                                                | 0.18       | (-1.29, 1.65)  | 0.808   | 1.56         | (-0.10, 3.23)  | 0.066   |
| FFA                                                  | 0.65       | (-0.62, 1.93)  | 0.316   | 0.42         | (-0.77, 1.60)  | 0.493   |
| IFA                                                  | 1.04       | (0.65, 1.43)   | < 0.001 | 1.49         | (1.07, 1.91)   | < 0.001 |
| RTPCR                                                | 1.91       | (1.42, 2.39)   | < 0.001 | 2.91         | (2.31, 3.51)   | < 0.001 |
| suckling mice                                        | -0.09      | (-0.81, 0.63)  | 0.803   | -0.51        | (-2.53, 1.52)  | 0.624   |
| log <sub>10</sub> dose                               | 0.00       | (0.00, 0.00)   | 0.114   | -0.31        | (-0.49, -0.12) | 0.002   |

Table S2: **Linear Associations with the Duration of Viremia** Table reports the results of the univariate and multivariate linear regression calculating associations between serotype, species, viremia assay used, and log<sub>10</sub> inoculating dose and duration of viremia. Estimates are differences in days of viremia for each covariate from rhesus monkeys infected with DENV-2 assayed using plaque count.

### Model Selection

Table S3 reports Akaike information criterion (AIC) values for the linear and random effects models and likelihood ratio tests for differences between models. We find random effects models are universally favored over linear models.

| Covariate        | Time to viremia |          |          | Duration |          |          |
|------------------|-----------------|----------|----------|----------|----------|----------|
|                  | Lin. AIC        | R.E. AIC | p        | Lin. AIC | R.E. AIC | p        |
| Serotype         | 2680.42         | 2504.07  | < 0.0001 | 3150.95  | 2975.66  | < 0.0001 |
| Species          | 2622.85         | 2485.22  | < 0.0001 | 3184.89  | 2994.60  | < 0.0001 |
| Assay            | 2581.47         | 2508.01  | < 0.0001 | 3128.07  | 2995.30  | < 0.0001 |
| $\log_{10}$ Dose | 2674.08         | 2510.47  | < 0.0001 | 3188.44  | 2998.25  | < 0.0001 |
| Multivariate     | 2521.66         | 2472.55  | < 0.0001 | 3020.60  | 2941.05  | < 0.0001 |

Table S3: **Model Selection** Table reports the reports AIC values for the linear (“Lin.”) and random effects (“R.E.”) models and likelihood ratio tests for differences between models.

### Additional Regression Results

Table S4 reports the results of the multivariate random effects regression for duration of viremia with DENV-2 as the reference serotype. We find durations of DENV-1, -3, and -4 viremia are significantly shorter than DENV-2 after adjusting for study, species, assay and  $\log_{10}$  dose.

| Covariate                                            | Multivariate | 95% CI         | p       |
|------------------------------------------------------|--------------|----------------|---------|
| DENV-2                                               | ref.         |                |         |
| DENV-1                                               | -1.21        | (-1.65, -0.77) | < 0.001 |
| DENV-3                                               | -0.47        | (-0.93, -0.02) | 0.026   |
| DENV-4                                               | -1.51        | (-1.99, -1.04) | < 0.001 |
| rhesus macaque ( <i>Macaca mulatta</i> )             | ref.         |                |         |
| chimpanzee ( <i>Pan troglodytes</i> )                | 0.26         | (-1.06, 1.59)  | 0.624   |
| common marmoset ( <i>Callithrix jacchus</i> )        | -1.80        | (-5.09, 1.49)  | 0.185   |
| cynomolgus macaques ( <i>Macaca fascicularis</i> )   | 0.00         | (-1.24, 1.24)  | 0.941   |
| green monkey ( <i>Chlorocebus aethiops sabaeus</i> ) | -1.48        | (-3.08, 0.12)  | 0.050   |
| owl monkeys ( <i>Aotus nancymae</i> )                | -1.29        | (-3.23, 0.66)  | 0.125   |
| patas ( <i>Erythrocebus patas</i> )                  | -2.35        | (-4.45, -0.25) | 0.026   |
| pig-tailed macaques ( <i>Macaca nemestrina</i> )     | -0.64        | (-3.16, 1.88)  | 0.514   |
| spider monkey ( <i>Ateles geoffroyi</i> )            | 0.34         | (-3.77, 4.46)  | 0.834   |
| squirrel monkey ( <i>Saimiri sciureus</i> )          | -1.39        | (-3.36, 0.59)  | 0.170   |
| white handed gibbon ( <i>Hylobates lar</i> )         | 0.09         | (-3.09, 3.28)  | 0.932   |
| plaque count                                         | ref.         |                |         |
| ELISA                                                | 1.34         | (-1.61, 4.30)  | 0.304   |
| FFA                                                  | 0.27         | (-2.22, 2.75)  | 0.788   |
| IFA                                                  | 1.34         | (0.05, 2.64)   | 0.018   |
| RTPCR                                                | 2.52         | (1.19, 3.85)   | < 0.001 |
| suckling mice                                        | -0.37        | (-3.92, 3.18)  | 0.807   |
| $\log_{10}$ dose                                     | -0.44        | (-0.69, -0.18) | < 0.001 |
| Intercept ( $\beta_0$ )                              | 6.24         | (4.72, 7.77)   | < 0.001 |
| Random Effect ( $\sigma$ )                           | 2.32         | (-0.67, 5.30)  |         |

Table S4: **Associations with Duration of Viremia, DENV-2 as Reference** Table reports the results of the multivariate mixed effects regression calculating associations between serotype, species, viremia assay used, and  $\log_{10}$  inoculating dose and duration of viremia with DENV-2 as the reference category. Mixed effects models included random effect for study. Estimates are differences in days of viremia for each covariate from rhesus monkeys infected with DENV-2 assayed using plaque count. P-values calculated using likelihood ratio tests. Durations of DENV-1, -3, and -4 viremia are significantly shorter than DENV-2 after adjusting for study, species, assay and  $\log_{10}$  dose. Estimates of the fixed intercept ( $\beta_0$ ) and variance of the random intercept are presented ( $\sigma$ ).

### Distribution of Time to- and Duration of Viremia

Figures S2 and S3 show histograms of the time to- and duration of DENV-1-4 viremia, respectively, pooled across non-human primates with maximum likelihood log-normal fits.

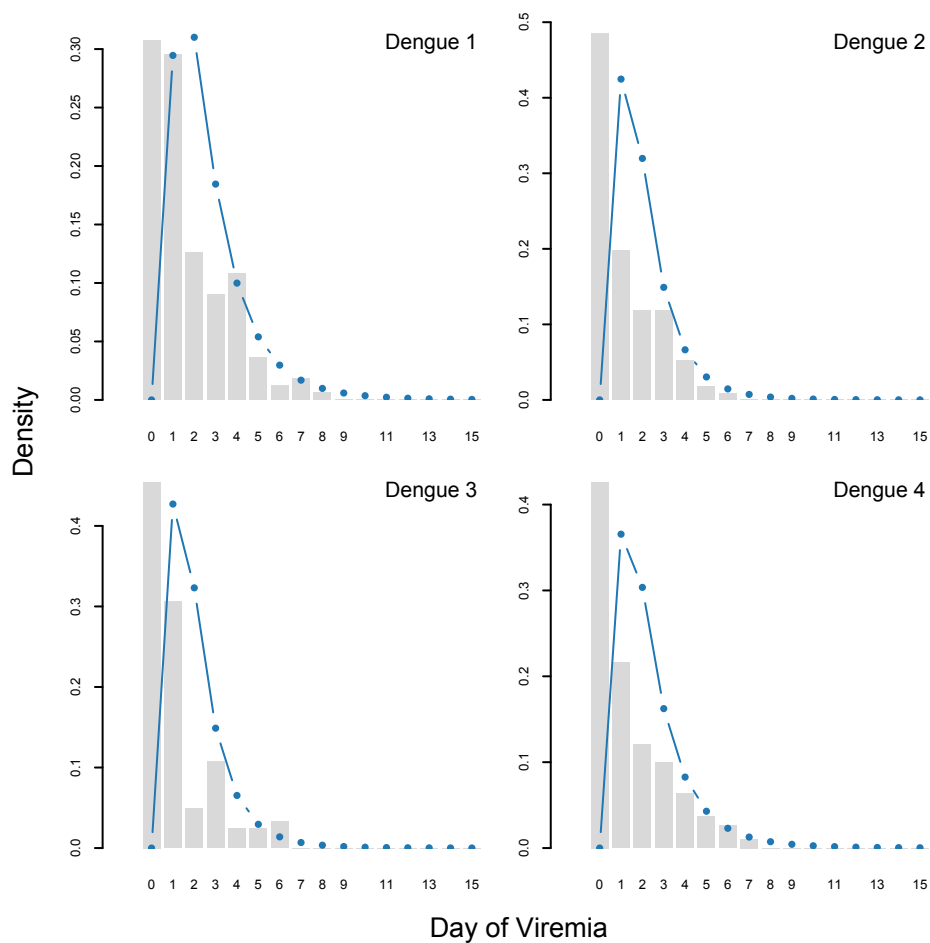

Figure S2: **Histogram of Time of DENV Viremia Pooled Across Primates** Figure shows histograms of the days to viremia by serotype pooled across non-human primates. Lines are log-normal maximum likelihood fits.

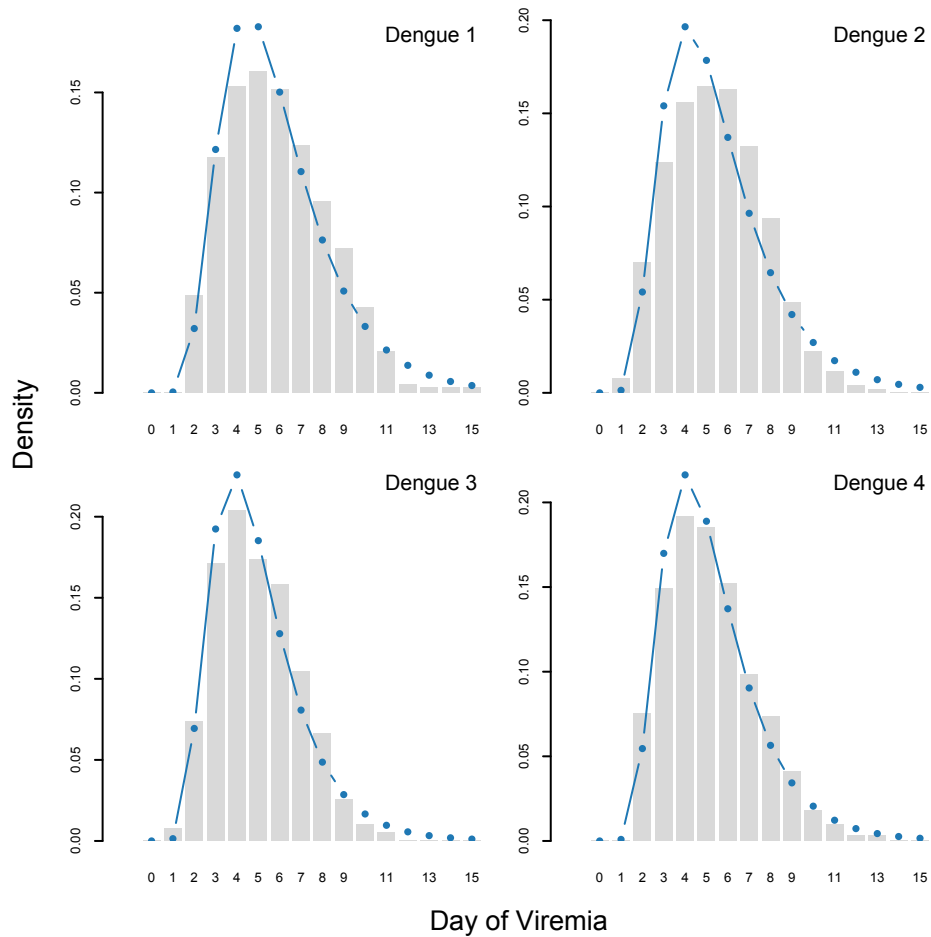

Figure S3: **Histogram of Duration of DENV Viremia Pooled Across Primates** Figure shows histograms of the days of viremia by serotype pooled across non-human primates. Lines are log-normal maximum likelihood fits.

### Combined Estimates of Viremia

Table S5 reports the doubly-interval censored estimates and bootstrap confidence intervals of time to- and duration of viremia pooled across all non-human primates.

| Serotype     | Percentile | Time to viremia   | Duration             |
|--------------|------------|-------------------|----------------------|
|              |            | Days (95% CI)     | Days (95% CI)        |
| 1<br>n = 166 | 5th        | 1.47 (1.30, 1.64) | 1.73 (1.50, 2.02)    |
|              | 25th       | 2.34 (2.14, 2.52) | 2.98 (2.70, 3.28)    |
|              | 50th       | 3.23 (3.00, 3.45) | 4.33 (4.03, 4.67)    |
|              | 75th       | 4.47 (4.14, 4.77) | 6.31 (5.87, 6.73)    |
|              | 95th       | 7.12 (6.42, 7.76) | 10.85 (9.75, 11.87)  |
| 2<br>n = 227 | 5th        | 0.88 (0.73, 1.03) | 1.84 (1.60, 2.12)    |
|              | 25th       | 1.60 (1.41, 1.79) | 3.25 (2.97, 3.55)    |
|              | 50th       | 2.44 (2.22, 2.65) | 4.84 (4.52, 5.15)    |
|              | 75th       | 3.71 (3.44, 3.94) | 7.19 (6.75, 7.60)    |
|              | 95th       | 6.78 (6.26, 7.31) | 12.72 (11.64, 13.84) |
| 3<br>n = 121 | 5th        | 1.33 (1.17, 1.54) | 1.17 (0.99, 1.41)    |
|              | 25th       | 2.10 (1.92, 2.31) | 2.17 (1.92, 2.46)    |
|              | 50th       | 2.89 (2.67, 3.11) | 3.34 (3.01, 3.68)    |
|              | 75th       | 3.96 (3.64, 4.30) | 5.12 (4.69, 5.61)    |
|              | 95th       | 6.25 (5.55, 7.07) | 9.49 (8.47, 10.51)   |
| 4<br>n = 190 | 5th        | 1.46 (1.34, 1.59) | 1.19 (1.05, 1.38)    |
|              | 25th       | 2.31 (2.17, 2.46) | 2.15 (1.96, 2.38)    |
|              | 50th       | 3.17 (2.98, 3.37) | 3.24 (3.01, 3.51)    |
|              | 75th       | 4.36 (4.07, 4.65) | 4.88 (4.54, 5.24)    |
|              | 95th       | 6.88 (6.29, 7.46) | 8.81 (7.97, 9.64)    |

Table S5: **Summary of DENV Virus Kinetics Pooled Across Primates** Table reports median days of DENV viremia with 95% confidence intervals for 5th, 25th, 50th, 75th, and 95th percentile.



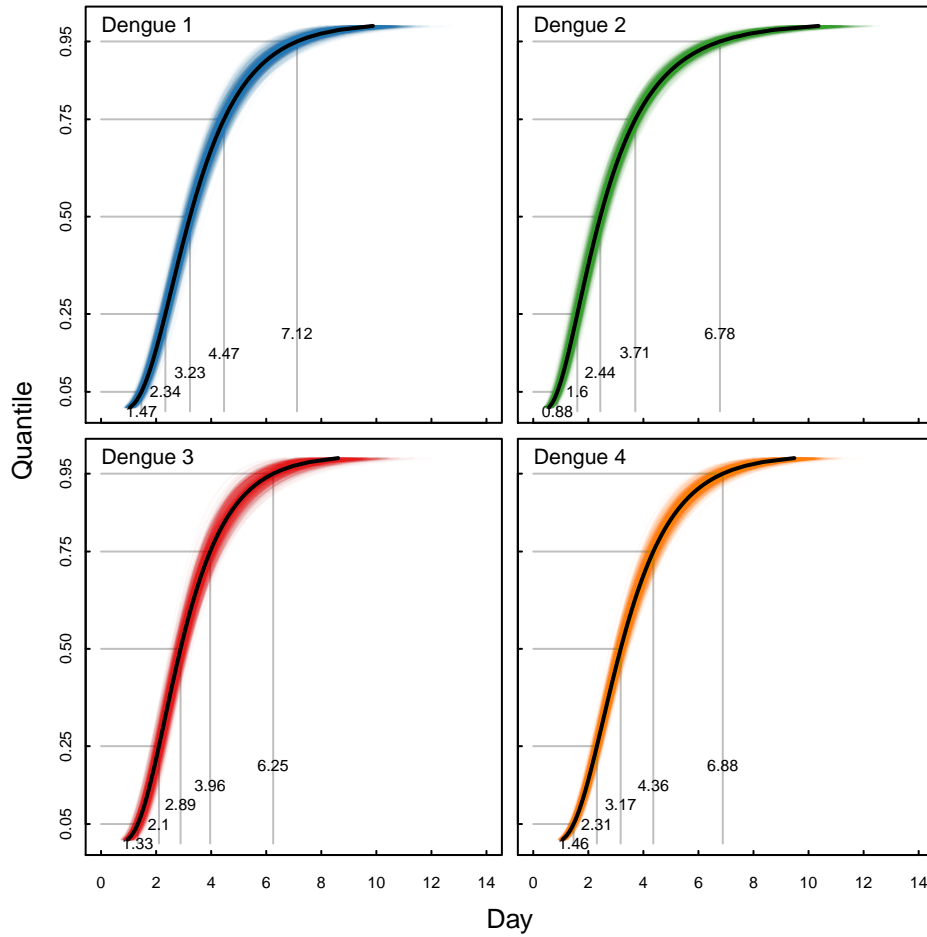

Figure S4: **Time to Viremia for DENV Pooled Across Primates** Figure shows estimates of the time to viremia (time from inoculation to positive isolation of virus) for DENV-1–4 pooled across all non-human primate species. Black lines indicate estimates from full dataset and light colored lines indicate bootstrap replicates. Grey lines indicate the 5th, 25th, 50th, 75th and 95th quantiles.

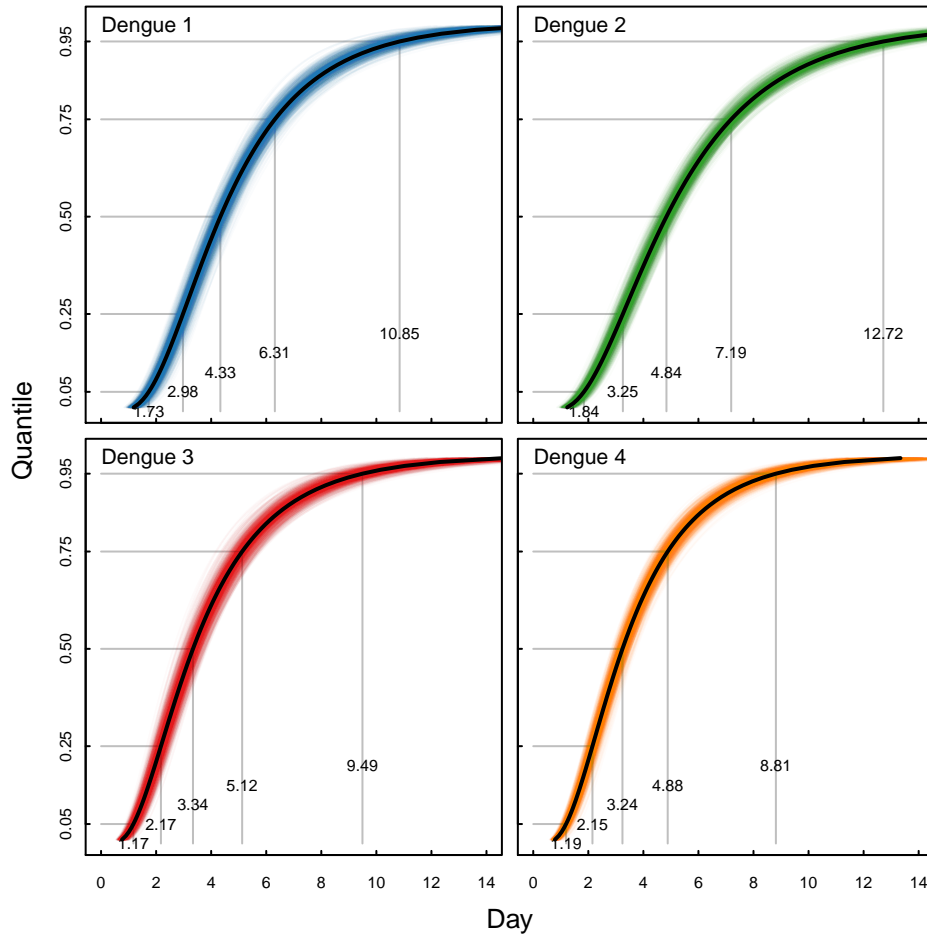

Figure S5: **Duration of DENV Infection Pooled Across Primates** Figure shows estimates of the duration of infection for DENV-1–4 pooled across all non-human primate species. Black lines indicate estimates from full dataset and light colored lines indicate bootstrap replicates. Grey lines indicate the 5th, 25th, 50th, 75th and 95th quantiles.

### Sensitivity Analysis: Choice of Cutoff for Interval Censoring

Table S6 reports the doubly-interval censored estimates and bootstrap confidence intervals of duration of viremia for Rhesus macaques with day 14 and day 18 as assumed maximum duration of viremia. We find no qualitative differences from the 16 day cutoff as presented in the main text.

| Serotype     | Percentile | Day 14 Cutoff<br>Days (95% CI) | Day 18 Cutoff<br>Days (95% CI) |
|--------------|------------|--------------------------------|--------------------------------|
| 1<br>n = 97  | 5th        | 2.03 (1.70, 2.46)              | 2.01 (1.70, 2.42)              |
|              | 25th       | 3.31 (2.93, 3.76)              | 3.31 (2.94, 3.75)              |
|              | 50th       | 4.66 (4.26, 5.10)              | 4.68 (4.27, 5.12)              |
|              | 75th       | 6.55 (6.02, 7.07)              | 6.63 (6.02, 7.20)              |
|              | 95th       | 10.69 (9.40, 11.85)            | 10.91 (9.49, 12.34)            |
| 2<br>n = 155 | 5th        | 2.26 (1.97, 2.60)              | 2.23 (1.95, 2.56)              |
|              | 25th       | 3.65 (3.33, 4.01)              | 3.65 (3.34, 3.98)              |
|              | 50th       | 5.10 (4.75, 5.47)              | 5.15 (4.80, 5.53)              |
|              | 75th       | 7.13 (6.64, 7.61)              | 7.27 (6.74, 7.80)              |
|              | 95th       | 11.54 (10.32, 12.60)           | 11.92 (10.53, 13.28)           |
| 3<br>n = 75  | 5th        | 1.04 (0.84, 1.32)              | 1.03 (0.84, 1.33)              |
|              | 25th       | 2.02 (1.73, 2.40)              | 2.02 (1.72, 2.40)              |
|              | 50th       | 3.22 (2.81, 3.67)              | 3.23 (2.80, 3.68)              |
|              | 75th       | 5.12 (4.52, 5.72)              | 5.15 (4.46, 5.75)              |
|              | 95th       | 10.00 (8.62, 11.26)            | 10.09 (8.57, 11.55)            |
| 4<br>n = 139 | 5th        | 1.10 (0.95, 1.32)              | 1.09 (0.94, 1.31)              |
|              | 25th       | 2.04 (1.82, 2.31)              | 2.04 (1.83, 2.30)              |
|              | 50th       | 3.13 (2.84, 3.45)              | 3.14 (2.87, 3.45)              |
|              | 75th       | 4.81 (4.39, 5.23)              | 4.83 (4.42, 5.29)              |
|              | 95th       | 8.91 (8.02, 9.92)              | 8.99 (7.96, 10.06)             |

Table S6: **Sensitivity Analyses to Choice of Day of Maximum Viremia** Table reports mean days of DENV viremia with 95% bootstrap confidence intervals for 5th, 25th, 50th, 75th, and 95th percentile, for 14 and 18 day cutoffs..
